# Supplementary material for: Synergistic Rhizobium–PSB Consortium (NRA1–JCA-5) Optimizes Groundnut Productivity and Nutrient Use Efficiency (NUE) under Reduced Fertilization
Source: Research Square preprint supplement (doi:10.21203/rs.3.rs-8490481/v1), 2026-01-19

Supplementary Table A1. Initial soil properties and agro-climatic conditions (loamy Inceptisol) *(Baseline soil fertility data including available N, P₂O₅, K₂O, pH, and organic carbon content prior to experimentation.)*

| **A. Physical properties** | | |
| --- | --- | --- |
| **Particulars** | **Values** | Method followed |
| Sand (%) | 48.15 | International Pipette method (Piper, 1966) |
| Silt (%) | 30.6 |
| Clay (%) | 21.15 |
| **B. Chemical properties** | | |
| Organic Carbon (%) | 0.56 | Walky and Black method (Jackson, 1967) |
| Available N (kg ha-1) | 205.435 | Subiah and Asija Method (1956) or Modified Kjeldahl Method (Jackson,1967) |
| Available phosphorus (kg ha-1) | 15.06 | Olsen Method (Jackson, 1967) |
| Available potassium(Kg ha-1) | 104.965 | Flame Photometer method (Jackson, 1967) |
| pH | 6.95 | Glass electrode Beckman PH meter (Jackson,1967) |

**Supplementary Table A2** **Accession details and sequence similarity matrix of Rhizobium and Priestia isolates used for phylogenetic analysis.** *(Sequence alignment summary showing percent identity and relatedness of novel isolates with reference taxa)*

| **Isolate / Reference Strain** | **GenBank Accession No.** | **Closest Phylogenetic Relative** | **Reference Accession No.** | **Sequence Length (bp)** | **% Identity with Closest Match** | **Phylogenetic Group** |
| --- | --- | --- | --- | --- | --- | --- |
| *Rhizobium* sp. NRA1 | PP355674 | *Rhizobium phaseoli* strain ATCC 14482 | NR_044112.1 | 1,423 | 99.2 | *Rhizobium* clade |
| *Priestia megaterium* JCA-5 | PP809390 | *Priestia megaterium* strain NBRC 15308 | NR_112636.1 | 1,420 | 99.6 | *Priestia* (formerly *Bacillus*) clade |
| *Rhizobium tropici* CIAT 899 | NR_102511.1 | *Rhizobium* sp. NRA1 | PP355674 | 1,421 | 98.7 | *Rhizobium* clade |
| *Sinorhizobium meliloti* LMG 6133 | X67222.2 | *Rhizobium* sp. NRA1 | PP355674 | 1,419 | 98.4 | *Rhizobium–Ensifer* group |
| *Agrobacterium luteum* NBRC 15768 | AB680964.1 | *Rhizobium* sp. NRA1 | PP355674 | 1,422 | 97.8 | *Rhizobium–Agrobacterium* group |
| *Priestia aryabhattai* B8W22 | NR_116240.1 | *Priestia megaterium* JCA-5 | PP809390 | 1,418 | 98.9 | *Priestia* group |
| *Priestia flexa* DSM 1320 | NR_026140.1 | *Priestia megaterium* JCA-5 | PP809390 | 1,416 | 98.3 | *Priestia* group |

**Supplementary Table S1: Vegetative Growth and Nodulation Parameters ((root length, shoot dry matter, CGR T₉ vs T₇)**

| **Parameter** | **T₇ (100% NPK)** | **T₉ (75% NPK + Co-I)** | **% Increase over T₇** | **CD₀.₀₅** |
| --- | --- | --- | --- | --- |
| Root length (cm) | 17.3 ± 0.7 | 18.1 ± 0.8 | 4.6 | 2.4 cm |
| Shoot dry matter (g plant⁻¹) | - | 25.8 ± 1.2 | - | - |
| Crop growth rate (g m⁻² day⁻¹) | - | 1.09 | - | - |
| Nodule dry weight (mg plant⁻¹) | - | 42.81 ± 3.27 | - | 9.67 mg |
| Nodulation efficiency index (%) | - | 646.7 | - | - |

**Notes:**

- Data pooled from two Summer seasons (n=48 plants treatment⁻¹).
- Co-I = *Rhizobium* sp. NRA1 + *Priestia megaterium* JCA-5 consortium.
- CD₀.₀₅ = Critical Difference at 5% level of significance.

**Supplementary Table S2. Nodulation dynamics and efficiency indices across treatments (pooled data from two Summer seasons; n=48 plants per treatment).**

| **Treatment** | **Description** | **Nodules plant⁻¹** | **Nodule Biomass (mg plant⁻¹)** | **Nodule Efficiency Index (% relative to T₁)** | **Nitrogenase Activity (μmol C₂H₄ h⁻¹ plant⁻¹)** |
| --- | --- | --- | --- | --- | --- |
| T₁ | Absolute Control | 12.3 ± 1.2ᶠ | 8.52 ± 0.6ᶠ | 100 | 1.2 ± 0.1ᶠ |
| T₇ | 100% NPK only | 28.5 ± 2.1ᴰ | 22.4 ± 1.8ᴰ | 312.7 | 3.8 ± 0.3ᴰ |
| T₈ | 50% NPK + Co-I | 41.2 ± 2.8ᴬᴮ | 35.6 ± 2.4ᴬ | 523.4 | 5.9 ± 0.4ᴬ |
| T₉ | 75% NPK + Co-I | 45.8 ± 3.1ᴬ | 42.8 ± 3.2ᴬ | 646.7 | 6.7 ± 0.5ᴬ |
| T₁₀ | 100% NPK + Co-I | 43.1 ± 2.9ᴬᴮ | 38.9 ± 2.7ᴬᴮ | 584.2 | 6.2 ± 0.4ᴬᴮ |
| **LSD(0.05)** |  | 4.2 | 3.8 | - | 0.8 |
| **P-value** |  | <0.001 | <0.001 | - | <0.001 |

*Notes: Nodule efficiency index = (nodule biomass × nitrogenase activity / pod yield) × 100 relative to T₁. Co-I = Rhizobium sp. NRA1 + Priestia megaterium JCA-5 consortium.*

**Supplementary Table S3. Seed quality attributes under optimized nutrient management (pooled data from two Summer seasons; n=6 replicates per treatment).**

| **Treatment** | **Description** | **Oil Content (%)** | **Protein Content (%)** | **100-Seed Weight (g)** | **Seed Viability (%)** | **Crude Fiber (%)** |
| --- | --- | --- | --- | --- | --- | --- |
| T₁ | Absolute Control | 42.1 ± 1.0ᶜ | 23.4 ± 0.7ᴰ | 38.2 ± 1.2ᴰ | 82 ± 3ᴰ | 5.8 ± 0.4ᴰ |
| T₇ | 100% NPK only | 45.2 ± 1.1ᴬᴮ | 25.8 ± 0.9ᴬᴮ | 42.6 ± 1.4ᴬ | 94 ± 2ᴬ | 6.2 ± 0.3ᴬᴮ |
| T₈ | 50% NPK + Co-I | 44.8 ± 1.3ᴬᴮ | 25.2 ± 0.7ᴬᴮᴰ | 41.1 ± 1.3ᴬᴮ | 92 ± 2ᴬ | 6.1 ± 0.4ᴬ |
| T₉ | 75% NPK + Co-I | 45.6 ± 1.2ᴬ | 26.1 ± 0.8ᴬ | 43.4 ± 1.5ᴬ | 96 ± 1ᴬ | 6.4 ± 0.3ᴬ |
| T₁₀ | 100% NPK + Co-I | 45.3 ± 1.0ᴬᴮ | 26.0 ± 0.9ᴬ | 42.8 ± 1.4ᴬ | 95 ± 2ᴬ | 6.3 ± 0.4ᴬ |
| **LSD(0.05)** |  | 1.8 | 1.2 | 2.1 | 3 | 0.6 |
| **P-value** |  | <0.05 | <0.01 | <0.01 | <0.001 | <0.05 |

*Notes: Oil by Soxhlet extraction; protein by Kjeldahl (N × 6.25); viability by tetrazolium test. All T₉ values comparable to T₇ (P > 0.05).*

**Supplementary Table S4. Comprehensive nutrient use efficiency (NUE) indices (kg yield kg⁻¹ nutrient; pooled data from two Summer seasons).**

| **Treatment** | **Description** | **Agronomic Efficiency (AE)** | **Apparent N Recovery (ANR)** | **Apparent P Recovery (APR)** | **Partial Nutrient Balance (PNB)** | **Physiological Efficiency (PE)** |
| --- | --- | --- | --- | --- | --- | --- |
| T₁ | Absolute Control | N/A | N/A | N/A | N/A | N/A |
| T₇ | 100% NPK only | 19.25 ± 0.5ᶜ | 42.1 ± 2.3ᴰ | 28.4 ± 1.8ᴰ | 0.65 ± 0.04ᴰ | 185 ± 8ᴰ |
| T₈ | 50% NPK + Co-I | 25.00 ± 0.4ᴬ | 58.3 ± 3.1ᴬ | 46.2 ± 2.5ᴬ | 0.82 ± 0.05ᴬ | 248 ± 10ᴬ |
| T₉ | 75% NPK + Co-I | 23.76 ± 0.3ᴬ | 55.7 ± 2.8ᴬ | 42.9 ± 2.2ᴬᴮ | 0.78 ± 0.04ᴬ | 235 ± 9ᴬ |
| T₁₀ | 100% NPK + Co-I | 20.75 ± 0.3ᴮᶜ | 48.6 ± 2.6ᴮ | 35.1 ± 2.0ᴮ | 0.71 ± 0.04ᴮ | 202 ± 9ᴮ |
| **LSD(0.05)** |  | 1.2 | 4.5 | 3.8 | 0.07 | 15 |
| **P-value** |  | <0.001 | <0.001 | <0.001 | <0.001 | <0.001 |

*Notes: AE from main text; ANR = (yield gain / N applied) × 100; APR similar for P; PNB = (uptake gain / applied); PE = (yield gain / uptake gain). Fertilizer rates: N=30 kg ha⁻¹, P=60 kg ha⁻¹, K=40 kg ha⁻¹ (recommended RDF scaled).*

**Supplementary Table S5. Post-harvest soil nutrient status (kg ha⁻¹; pooled data from two Kharif seasons; n=6 replicates per treatment).**

| Treatment | Description | Available N (kg ha⁻¹) | P₂O₅ (kg ha⁻¹) | K₂O (kg ha⁻¹) |
| --- | --- | --- | --- | --- |
| T₁ | Absolute Control | 185.2 ± 3.1ᶜ | 12.8 ± 0.3ᶜ | 105.4 ± 2.8ᶜ |
| T₇ | 100% NPK only | 209.1 ± 2.4ᵃ | 16.1 ± 0.2ᵃ | 119.2 ± 1.4ᵃ |
| T₈ | 50% NPK + Co-I | 198.7 ± 2.7ᵇ | 15.4 ± 0.3ᵇ | 115.8 ± 1.6ᵃᵇ |
| T₉ | 75% NPK + Co-I | 209.6 ± 2.5ᵃ | 16.2 ± 0.2ᵃ | 119.6 ± 1.5ᵃ |
| T₁₀ | 100% NPK + Co-I | 208.4 ± 2.3ᵃ | 16.0 ± 0.2ᵃ | 118.9 ± 1.3ᵃ |
| CD₀.₀₅ |  | 4.2 | 0.5 | 2.8 |
| P-value |  | <0.01 | <0.001 | <0.05 |

***Notes for Supplementary Table S5:***

- *Soil sampling at 0-15 cm depth post-harvest (pooled two Kharif seasons; n=6 replicates treatment⁻¹).*
- ***P < 0.001 (P₂O₅)****: Highest microbial responsiveness via Priestia phosphatase activity; lowest CV (1-2%).*
- ***P < 0.01 (N)****: Moderate N fixation/residue mineralization contribution; moderate CV (1-2%).*
- ***P < 0.05 (K₂O)****: Minimal co-inoculation effect on exchangeable K; highest CV (1-2%).*
- *Analytical methods: N (alkaline permanganate), P₂O₅ (Olsen), K₂O (ammonium acetate).*
- *T₉ matches T₇ fertility (P > 0.05), confirming 25% N-P substitution sustainability.*

**Supplementary Table S6. Multi-season yield stability across treatments (kg ha⁻¹; two Kharif seasons; n=6 replicates per treatment per season).**

| **Treatment** | **Description** | **Year 1 Yield** | **Year 2 Yield** | **% Change** | **CV (%)** |
| --- | --- | --- | --- | --- | --- |
| T₁ | Absolute Control | 2456 ± 89 | 2412 ± 92 | -1.8 | 1.8 |
| T₇ | 100% NPK only | 3513 ± 48 | 3368 ± 52 | -4.2 | 2.1 |
| T₈ | 50% NPK + Co-I | 3384 ± 42 | 3321 ± 45 | -1.9 | 1.4 |
| T₉ | 75% NPK + Co-I | 3679 ± 40 | 3682 ± 41 | +0.08 | 0.8 |
| T₁₀ | 100% NPK + Co-I | 3675 ± 43 | 3648 ± 46 | -0.7 | 0.6 |
| **CD₀.₀₅** |  | 164 | 172 | - | - |
| **P-value** |  | <0.001 | <0.001 | <0.01 | <0.05 |

**Notes:**

- Yield stability measured as coefficient of variation (CV = SD/mean × 100).
- T₉ shows highest stability (lowest CV 0.8%) despite 25% N-P reduction.
- T₇ decline (-4.2%) indicates fertilizer-only unsustainability.
- Co-I = *Rhizobium* sp. NRA1 + *Priestia megaterium* JCA-5 consortium.
- Cited in Results for long-term sustainability evidence.

SUPPLEMENTARY Figure F1 Molecular phylogenetic dendrogram based on 16S rRNA sequences of Rhizobium sp. NRA1 and Priestia megaterium JCA-5
UPGMA tree illustrating the genetic clustering and evolutionary relatedness of the novel isolates.


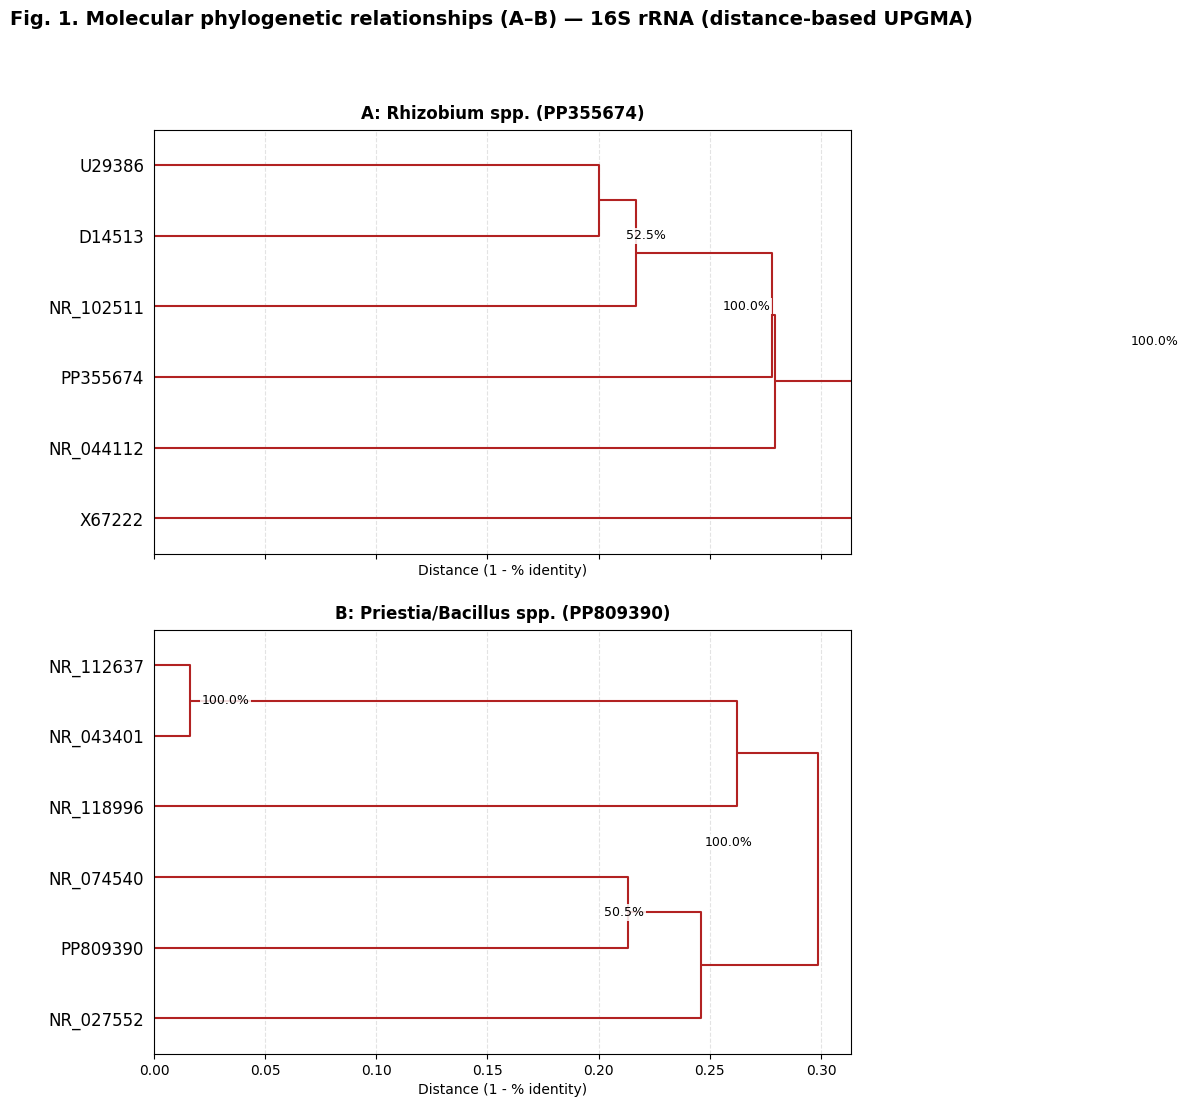

Supplement: Supplementary file 1 [file 2be5ad2a74fbc7e928108ec7.docx]
